# Supplementary material for: Deep learning segmentation results in precise delineation of the putamen in multiple system atrophy
Source: Springer Nature journal article supplement (doi:10.1007/s00330-023-09665-2), 2023-05-01
Supplement: MOESM1 [file 25306090]

## Supplement

**Supplementary Table 1** Neurodegeneration-dedicated MRI protocol (3-Tesla MAGNETOM Prisma, Siemens Healthcare, Erlangen, Germany).

| MRI sequence            | No. of slices/ thickness (mm) | Voxel size (mm <sup>3</sup> ) | TI/TR/TE/ $\alpha$ (ms/ms/ms/ $^\circ$ ) | acquisition time (min:sec) |
|-------------------------|-------------------------------|-------------------------------|------------------------------------------|----------------------------|
| Sagittal 3D MPRAGE      | 160/1                         | 1x1x1                         | 1100/2500/2.82/7                         | 3:58                       |
| Sagittal 3D FLAIR-SPACE | 160/1                         | 1x1x1                         | 1800/5000/388/var                        | 6:52                       |
| Axial 2D SWI            | 72/2                          | 0.9x0.9x2                     | -/27/20/17                               | 2:39                       |

MPRAGE Magnetization Prepared Rapid Gradient Echo, FLAIR SPACE Fluid-Attenuated Inversion Recovery - sampling perfection with application-optimized contrasts by using flip angle evolution, TSE Turbo Spin Echo, TI inversion time, TR repetition time, TE echo time,  $\alpha$  flip angle

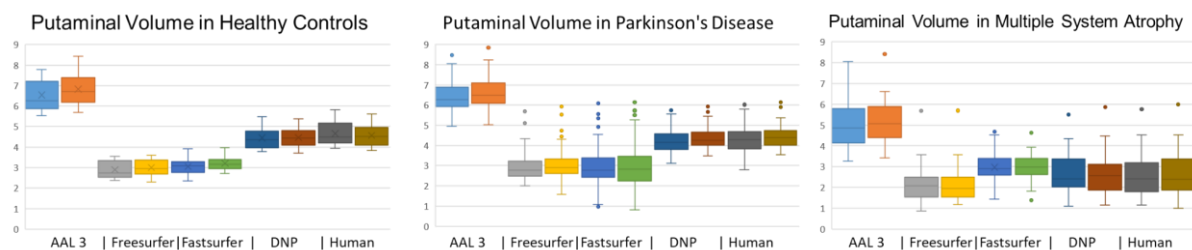

**Supplementary Figure 1** Putaminal volumes (ml) for both sides (left segmentation is given as the left boxplot for the employed approach respectively) as obtained by the different outputs and split by the groups

**AAL3**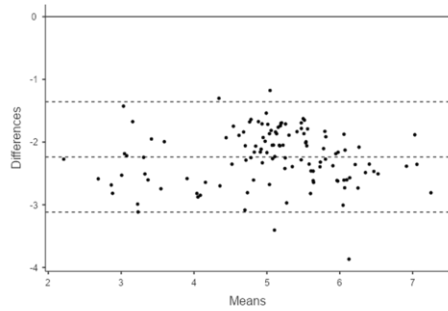

|                          | 95% Confidence Interval |        |       |
|--------------------------|-------------------------|--------|-------|
|                          | Estimate                | Lower  | Upper |
| Bias ( n = 120 )         | -2.24                   | -2.32  | -2.16 |
| Lower limit of agreement | -3.12                   | -3.257 | -2.98 |
| Upper limit of agreement | -1.36                   | -1.49  | -1.22 |

**Freesurfer**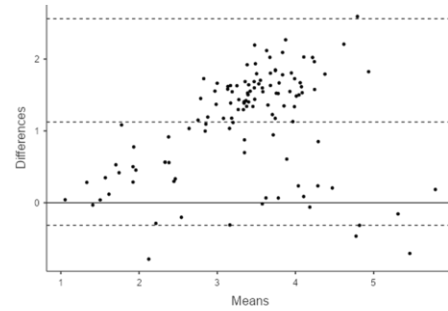

|                          | 95% Confidence Interval |       |       |
|--------------------------|-------------------------|-------|-------|
|                          | Estimate                | Lower | Upper |
| Bias ( n = 120 )         | 1.12                    | 0.99  | 1.26  |
| Lower limit of agreement | -0.31                   | -0.54 | -0.09 |
| Upper limit of agreement | 2.56                    | 2.33  | 2.79  |

**Fastsurfer**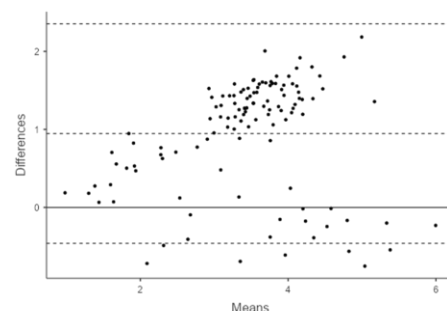

|                          | 95% Confidence Interval |       |       |
|--------------------------|-------------------------|-------|-------|
|                          | Estimate                | Lower | Upper |
| Bias ( n = 120 )         | 0.95                    | 0.82  | 1.08  |
| Lower limit of agreement | -0.46                   | -0.68 | -0.24 |
| Upper limit of agreement | 2.35                    | 2.13  | 2.58  |

**Deep Neural Patchwork**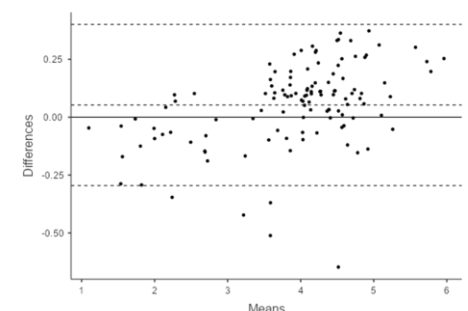

|                          | 95% Confidence Interval |       |       |
|--------------------------|-------------------------|-------|-------|
|                          | Estimate                | Lower | Upper |
| Bias ( n = 120 )         | 0.05                    | 0.02  | 0.08  |
| Lower limit of agreement | -0.29                   | -0.35 | -0.24 |
| Upper limit of agreement | 0.40                    | 0.35  | 0.46  |

**Supplementary Figure 1** Bland-Altman plots showing the mean difference (ml) between the respective algorithm vs. human ground truth labeling and the overall average versus the overall average regarding the putaminal volume.
